# Supplementary material
Source: PubMed Central journal article supplement (PMC4213625)
Supplement: rspb20141796supp1.pdf [file rspb20141796supp1.pdf]

## Supplementary Material

**Table S1.** Non-additive effects of host diversity on *Bd* infection loads. Mean net effect, complementarity and selection across diverse assemblages, excluding mixtures that experienced mortality (N=6).

| Factor                       | Mean    | Upper 95% CI | Lower 95% CI |
|------------------------------|---------|--------------|--------------|
| Net effect of host diversity | -0.863* | -0.096       | -1.630       |
| Complementarity              | -0.839* | -0.050       | -1.628       |
| Selection                    | -0.024  | 0.142        | -0.191       |

\*  $P < 0.05$ ;  $N=19$ .

**Table S2.** Selection and complementarity across the 25 multi-host assemblages. Species acronyms are: *B. pitanga* – PIT, *I. parva* – PAR, *D. minutus* – MIN, *H. bandeirantes* – BAN, *S. hayii* – HAY, *H. phyllodes* – PHY, and *P. cuvieri* – CUV.

| Selection | Complementarity | PIT | PAR | MIN | BAN | HAY | PHY | CUV |
|-----------|-----------------|-----|-----|-----|-----|-----|-----|-----|
| 0.714     | -1.869          | X   |     | X   |     | X   |     | X   |
| 0.525     | -1.142          | X   |     | X   |     | X   | X   |     |
| 0.440     | -1.246          | X   | X   |     |     |     | X   | X   |
| 0.413     | -3.401          |     |     | X   |     | X   | X   | X   |
| 0.153     | 1.573           | X   |     | X   | X   | X   |     |     |
| 0.152     | -3.504          | X   | X   | X   |     | X   |     |     |
| 0.150     | 1.885           | X   | X   |     | X   | X   |     |     |
| 0.135     | -1.252          | X   | X   | X   |     |     |     | X   |
| 0.116     | -0.718          |     | X   | X   | X   | X   |     |     |
| 0.091     | -0.712          | X   | X   | X   |     |     | X   |     |
| 0.059     | -3.081          | X   | X   | X   | X   |     |     |     |
| 0.050     | 0.902           | X   |     |     | X   |     | X   | X   |
| 0.003     | -0.116          | X   |     |     |     | X   | X   | X   |
| -0.085    | -0.566          |     |     | X   | X   |     | X   | X   |
| -0.127    | -3.366          | X   |     |     | X   | X   |     | X   |
| -0.149    | -2.287          | X   |     | X   | X   |     | X   |     |
| -0.154    | 0.387           |     | X   |     | X   |     | X   | X   |
| -0.181    | 2.837           |     | X   |     | X   | X   | X   |     |
| -0.236    | 1.009           |     | X   |     |     | X   | X   | X   |
| -0.238    | -1.033          |     |     |     | X   | X   | X   | X   |
| -0.252    | -0.022          |     |     | X   | X   | X   |     | X   |
| -0.254    | -0.539          |     |     | X   | X   | X   | X   |     |
| -0.325    | -0.174          |     | X   | X   |     | X   | X   |     |
| -0.489    | -0.850          | X   |     | X   | X   |     |     | X   |
| -0.699    | 0.081           |     | X   | X   |     |     | X   | X   |
